# Supplementary material for: Multifactorial Model Based on DWI-Radiomics to Determine HPV Status in Oropharyngeal Squamous Cell Carcinoma
Source: MDPI journal article supplement (doi:10.3390/app12147244), 2022-07-19
Supplement: s1 [file s1]

## Content:

### Tables

- ✓ **Supplementary Table S1:** List of radiomic features derived from ADC and D maps
- ✓ **Supplementary Table S2:** Details about image pre-processing before feature extraction.
- ✓ **Supplementary Table S3.** Values of the most significant features for differentiating HPV-negative from HPV-positive patients, based on the Mann-Whitney test.
- ✓ **Supplementary Table S4** Comparison between the models in the validation set by the mid-p-value McNemar test

### Figures

- ✓ **Supplementary Figure S1:** The effect of the ComBat-based feature harmonization on the validation set.
- ✓ **Supplementary Figure S2:** Comparison between accuracies obtained from different families of machine learning algorithms.

**Supplementary Table S1.** List of included Radiomic Features

| Feature Family (Count)                      | Feature Name                                                                                                                                                                                                                                                                                                                                                                                                                                                                                                                                                                          |
|---------------------------------------------|---------------------------------------------------------------------------------------------------------------------------------------------------------------------------------------------------------------------------------------------------------------------------------------------------------------------------------------------------------------------------------------------------------------------------------------------------------------------------------------------------------------------------------------------------------------------------------------|
| <i>Intensity Direct</i> (39)                | Energy, EnergyNorm, GlobalEntropy, GlobalMax, GlobalMean, GlobalMedian, GlobalMin, GlobalStd, GlobalUniformity, InterQuartileRange, Kurtosis, LocalEntropyMax, LocalEntropyMean, LocalEntropyMedian, LocalEntropyMin, LocalEntropyStd, LocalRangeMax, LocalRangeMean, LocalRangeMedian, LocalRangeMin, LocalRangeStd, LocalStdMax, LocalStdMean, LocalStdMedian, LocalStdMin, LocalStdStd, MeanAbsoluteDeviation, MedianAbsoluteDeviation, 5Percentile, 10Percentile, 25Percentile, 50Percentile, 75Percentile, 90Percentile, 95Percentile, Range, RootMeanSquare, Skewness, Variance |
| <i>Intensity Histogram</i> (13)             | InterQuartileRange, Kurtosis, MeanAbsoluteDeviation, MedianAbsoluteDeviation, 5Percentile, 10Percentile, 25Percentile, 50Percentile, 75Percentile, 90Percentile, 95Percentile, Range, Skewness                                                                                                                                                                                                                                                                                                                                                                                        |
| <i>Grey-level co-occurrence matrix</i> (25) | JointMaximum, JointAverage, JointVariance, JointEntropy, DifferenceAverage, DifferenceVariance, DifferenceEntropy, SumAverage, SumVariance, SumEntropy, AngularSecondMoment, Contrast, Dissimilarity, InverseDifference, InverseDiffNorm, InverseDiffMoment, InverseDiffMomentNorm, InverseVariance, Correlation, AutoCorrelation, ClusterTendency, ClusterShade, ClusterProminence, InformationMeasureCor1, InformationMeasureCor2                                                                                                                                                   |
| <i>Gray Level Run Length Matrix</i> (16)    | ShortRunEmphasis, LongRunEmphasis, LowGLRunEmpha, HighGLRunEmpha, ShortRunLowGLEmpha, ShortRunHighGLEmpha, LongRunLowGLEmpha, LongRunHighGLEmpha, GLNonuniformity, GLNonuniformityNorm, RLNonuniformity, RLNonuniformityNorm, RunPercentage,                                                                                                                                                                                                                                                                                                                                          |

|                                               |                                                                                                                                                                                                                                                                                                                                         |
|-----------------------------------------------|-----------------------------------------------------------------------------------------------------------------------------------------------------------------------------------------------------------------------------------------------------------------------------------------------------------------------------------------|
|                                               | GrayLevelVariance, RunLengthVariance, RunEntropy                                                                                                                                                                                                                                                                                        |
| <i>Gray Level Distant Zone Matrix (16)</i>    | SmallDistEmphasis, LargeDistEmphasis,<br>LowGrayLevelEmpha, HighGrayLevelEmpha,<br>SmallDistLowGLEmpha, SmallDistHighGLEmpha,<br>LargeDistLowGLEmpha<br>LargeDistHighGLEmpha, GLNonuniformity,<br>GLNonuniformityNorm, ZDNonuniformity,<br>ZDNonuniformityNorm, ZonePercentage,<br>GrayLevelVariance, ZoneDistVariance, ZoneDistEntropy |
| <i>Gray Level Size Zone Matrix (16)</i>       | SmallZoneEmphasis, LargeZoneEmphasis,<br>LowGLZoneEmpha, HighGLZoneEmpha,<br>SmallZoneLowGLEmpha<br>SmallZoneHighGLEmpha, LargeZoneLowGLEmpha,<br>LargeZoneHighGLEmpha, GLNonuniformity,<br>GLNonuniformityNorm<br>SZNonuniformity, SZNonuniformityNorm, ZonePercentage,<br>GrayLevelVariance, SizeZoneVariance, SizeZoneEntropy        |
| <i>Neighboring Gray Level Dependence (16)</i> | LowDepenEmphasis, HighDepenEmphasis,<br>LowGLCountEmpha, HighGLCountEmpha<br>LowDepenLowGLEmpha, LowDepenHighGLEmpha,<br>HighDepenLowGLEmpha, HighDepenHighGLEmpha<br>GLNonuniformity, GLNonuniformityNorm,<br>DepCountNonuniformity, DepCountNonuniformityNorm<br>GLVariance, DepCountVariance, DepCountEntropy,<br>DepCountEnergy     |
| <i>Morphology (16)</i>                        | Volume, ApproximateVolume, SurfaceArea,<br>SurfaceToVolumeRatio, Compactness1, Compactness2<br>SphericalDisproportion, Sphericity, Asphericity,<br>CentreOfMassShift, Maximum3DDiameter<br>MajorAxisLength, MinorAxisLength, LeastAxisLength,<br>Elongation, Flatness                                                                   |

**Supplementary Table S2.** Details about pre-processing before feature extraction

| <b>Feature Family</b>      | <b>Interpolation</b>                        | <b>Re-segmentation</b>                                 | <b>Intensity Discretization</b>                     |
|----------------------------|---------------------------------------------|--------------------------------------------------------|-----------------------------------------------------|
| <i>Intensity Direct</i>    | none                                        | Range: $[0.25-3] \times 10^{-3} \text{ mm}^2/\text{s}$ | FBS ( $0.1 \times 10^{-3} \text{ mm}^2/\text{s}$ )  |
| <i>Intensity Histogram</i> | none                                        | Range: $[0.25-3] \times 10^{-3} \text{ mm}^2/\text{s}$ | FBS ( $0.1 \times 10^{-3} \text{ mm}^2/\text{s}$ )  |
| <i>GLCM</i>                | 3D ( $3 \times 3 \times 3 \text{ mm}^3$ )*  | Range: $[0.25-3] \times 10^{-3} \text{ mm}^2/\text{s}$ | FBS ( $0.1 \times 10^{-3} \text{ mm}^2/\text{s}$ )  |
| <i>GLRLM</i>               | 3D ( $3 \times 3 \times 3 \text{ mm}^3$ ) * | Range: $[0.25-3] \times 10^{-3} \text{ mm}^2/\text{s}$ | FBS ( $0.1 \times 10^{-3} \text{ mm}^2/\text{s}$ )  |
| <i>GLSZM</i>               | 3D ( $3 \times 3 \times 3 \text{ mm}^3$ )   | Range: $[0.25-3] \times 10^{-3} \text{ mm}^2/\text{s}$ | FBS ( $0.35 \times 10^{-3} \text{ mm}^2/\text{s}$ ) |
| <i>GLDZM</i>               | 3D ( $3 \times 3 \times 3 \text{ mm}^3$ )   | Range: $[0.25-3] \times 10^{-3} \text{ mm}^2/\text{s}$ | FBS ( $0.35 \times 10^{-3} \text{ mm}^2/\text{s}$ ) |
| <i>NGLD</i>                | 3D ( $3 \times 3 \times 3 \text{ mm}^3$ )   | Range: $[0.25-3] \times 10^{-3} \text{ mm}^2/\text{s}$ | FBS ( $0.1 \times 10^{-3} \text{ mm}^2/\text{s}$ )  |
| <i>Morphology</i>          | none                                        | none                                                   | none                                                |

\*Aggregation method: 3D average; Directions: [0 1 2 3 4 5 6 7 8 9 10 11 12]. A detailed description of radiomic features is reported in IBSI reference manual (Zwanenburg A, Leger S, Vallières M, Löck S. Image biomarker standardisation initiative. arXiv preprint arXiv:1612.07003].

Abbreviations: FBS, fixed bin size; GLCM, Grey Level Co-occurrence Matrix ; GLRLM, Gray Level Run Length Matrix; GLSZM, Gray Level Size Zone Matrix; GLDZM, Gray Level Distant Zone Matrix; NGLD, Neighboring Gray Level Dependence.

**Supplementary Table S3.** Values of the most significant features ( $p < 0.01$ ) for differentiating HPV-negative from HPV-positive patients on the training cohort, based on the Mann-Whitney test.

| Features (263)                | HPV-negative |        | HPV-positive |        | P value |
|-------------------------------|--------------|--------|--------------|--------|---------|
|                               | Median       | IQR*   | Median       | IQR    |         |
| EnergyNorm_ADCPT              | 2071292      | 921556 | 1371320      | 569555 | <0.001  |
| GlobalEntropy_ADCPT           | 6.14         | 0.59   | 5.94         | 0.38   | 0.002   |
| GlobalMean_ADCPT              | 1409         | 290    | 1143         | 231    | <0.001  |
| GlobalMedian_ADCPT            | 1357         | 274    | 1118         | 233    | <0.001  |
| GlobalStd_ADCPT               | 330          | 146    | 267          | 70     | 0.001   |
| GlobalUniformity_ADCPT        | 0.02         | 0.01   | 0.02         | 0.01   | 0.002   |
| InterQuartileRange_ADCPT      | 427          | 153    | 330          | 105    | 0.002   |
| MeanAbsoluteDeviation_ADCPT   | 259          | 112    | 209          | 61     | 0.001   |
| MedianAbsoluteDeviation_ADCPT | 209          | 81     | 161          | 51     | 0.001   |
| 5Percentile_ADCPT             | 910          | 179    | 757          | 235    | 0.003   |
| 10Percentile_ADCPT            | 1020         | 206    | 822          | 201    | 0.001   |
| 25Percentile_ADCPT            | 1150         | 270    | 975          | 189    | <0.001  |
| 50Percentile_ADCPT            | 1357         | 274    | 1118         | 233    | <0.001  |
| 75Percentile_ADCPT            | 1546         | 346    | 1309         | 262    | <0.001  |
| 90Percentile_ADCPT            | 1782         | 398    | 1512         | 310    | <0.001  |
| 95Percentile_ADCPT            | 1953         | 492    | 1628         | 320    | <0.001  |
| RootMeanSquare_ADCPT          | 1439         | 318    | 1171         | 238    | <0.001  |
| Skewness_ADCPT                | 0.17         | 0.61   | 0.61         | 0.50   | 0.001   |
| Variance_ADCPT                | 109076       | 99425  | 71421        | 37367  | 0.001   |
| InterQuartileRange_ADCPT      | 429          | 220    | 330          | 105    | 0.002   |
| MeanAbsoluteDeviation_ADCPT   | 265          | 131    | 210          | 66     | 0.001   |
| MedianAbsoluteDeviation_ADCPT | 211          | 91     | 162          | 53     | 0.002   |
| 10Percentile_ADCPT            | 961          | 195    | 818          | 199    | 0.006   |
| 25Percentile_ADCPT            | 1150         | 265    | 964          | 195    | <0.001  |
| 50Percentile_ADCPT            | 1357         | 277    | 1118         | 235    | <0.001  |
| 75Percentile_ADCPT            | 1546         | 349    | 1305         | 246    | <0.001  |
| 90Percentile_ADCPT            | 1774         | 408    | 1511         | 306    | <0.001  |
| 95Percentile_ADCPT            | 1945         | 492    | 1628         | 320    | <0.001  |
| Skewness_ADCPT                | -0.05        | 0.76   | 0.38         | 0.66   | 0.010   |
| EnergyNorm_DPT                | 1560916      | 639489 | 941143       | 474717 | <0.001  |
| GlobalEntropy_DPT             | 6.16         | 0.69   | 5.81         | 0.60   | 0.003   |
| GlobalMean_DPT                | 1203         | 229    | 934          | 240    | <0.001  |
| GlobalMedian_DPT              | 1152         | 248    | 910          | 242    | <0.001  |
| GlobalStd_DPT                 | 323          | 135    | 244          | 104    | 0.006   |
| GlobalUniformity_DPT          | 0.02         | 0.01   | 0.02         | 0.01   | 0.005   |
| InterQuartileRange_DPT        | 404          | 202    | 296          | 154    | 0.007   |
| MeanAbsoluteDeviation_DPT     | 254          | 107    | 189          | 88     | 0.006   |
| MedianAbsoluteDeviation_DPT   | 204          | 107    | 145          | 78     | 0.004   |
| 10Percentile_DPT              | 836          | 226    | 664          | 263    | 0.001   |
| 25Percentile_DPT              | 988          | 215    | 769          | 261    | <0.001  |
| 50Percentile_DPT              | 1152         | 248    | 910          | 242    | <0.001  |
| 75Percentile_DPT              | 1413         | 297    | 1066         | 283    | <0.001  |
| 90Percentile_DPT              | 1620         | 375    | 1280         | 365    | <0.001  |
| 95Percentile_DPT              | 1698         | 419    | 1385         | 396    | <0.001  |

|                                |         |         |         |        |        |
|--------------------------------|---------|---------|---------|--------|--------|
| RootMeanSquare _DPT            | 1249    | 258     | 970     | 243    | <0.001 |
| Skewness _DPT                  | 0.41    | 0.60    | 0.74    | 0.54   | 0.004  |
| Variance _DPT                  | 104574  | 81226   | 59464   | 51980  | 0.006  |
| MedianAbsoluteDeviation _DPT   | 227     | 130     | 150     | 93     | 0.008  |
| 25Percentile _DPT              | 958     | 297     | 737     | 290    | 0.001  |
| 50Percentile _DPT              | 1151    | 263     | 883     | 272    | <0.001 |
| 75Percentile _DPT              | 1409    | 292     | 1051    | 261    | <0.001 |
| 90Percentile _DPT              | 1590    | 355     | 1279    | 336    | <0.001 |
| 95Percentile _DPT              | 1698    | 407     | 1376    | 381    | <0.001 |
| Skewness _DPT                  | -0.19   | 0.99    | 0.23    | 0.86   | 0.009  |
| EnergyNorm _ADCLN              | 2046561 | 1635080 | 1330094 | 626770 | <0.001 |
| GlobalEntropy _ADCLN           | 6.32    | 0.69    | 5.93    | 0.42   | <0.001 |
| GlobalMax _ADCLN               | 2783    | 594     | 2257    | 552    | 0.001  |
| GlobalMean _ADCLN              | 1384    | 482     | 1101    | 275    | <0.001 |
| GlobalMedian _ADCLN            | 1371    | 393     | 1056    | 284    | <0.001 |
| GlobalStd _ADCLN               | 372     | 181     | 284     | 93     | <0.001 |
| GlobalUniformity _ADCLN        | 0.016   | 0.008   | 0.020   | 0.004  | <0.001 |
| InterQuartileRange _ADCLN      | 467     | 278     | 337     | 134    | <0.001 |
| LocalEntropyMean _ADCLN        | 5.23    | 0.25    | 5.09    | 0.23   | 0.005  |
| LocalEntropyMedian _ADCLN      | 5.35    | 0.28    | 5.13    | 0.25   | 0.001  |
| LocalRangeMean _ADCLN          | 984     | 289     | 750     | 261    | 0.002  |
| LocalRangeMedian _ADCLN        | 876     | 408     | 644     | 288    | 0.001  |
| LocalStdMean _ADCLN            | 281     | 84      | 207     | 80     | 0.001  |
| LocalStdMedian _ADCLN          | 245     | 105     | 175     | 85     | 0.001  |
| LocalStdStd _ADCLN             | 149     | 77      | 132     | 51     | 0.010  |
| MeanAbsoluteDeviation _ADCLN   | 293     | 156     | 219     | 77     | <0.001 |
| MedianAbsoluteDeviation _ADCLN | 205     | 149     | 161     | 46     | <0.001 |
| 10Percentile _ADCLN            | 943     | 270     | 818     | 243    | 0.008  |
| 25Percentile _ADCLN            | 1145    | 303     | 917     | 233    | <0.001 |
| 50Percentile _ADCLN            | 1371    | 393     | 1056    | 284    | <0.001 |
| 75Percentile _ADCLN            | 1559    | 631     | 1253    | 317    | <0.001 |
| 90Percentile _ADCLN            | 1837    | 683     | 1497    | 353    | <0.001 |
| 95Percentile _ADCLN            | 2024    | 622     | 1643    | 356    | <0.001 |
| Range _ADCLN                   | 2386    | 666     | 1839    | 561    | 0.001  |
| RootMeanSquare _ADCLN          | 1430    | 541     | 1153    | 269    | <0.001 |
| Skewness _ADCLN                | 0.41    | 0.61    | 0.84    | 0.62   | 0.007  |
| Variance _ADCLN                | 138741  | 140336  | 80682   | 54523  | <0.001 |
| InterQuartileRange _ADCLN      | 485     | 260     | 345     | 153    | <0.001 |
| MeanAbsoluteDeviation _ADCLN   | 314     | 157     | 227     | 90     | <0.001 |
| MedianAbsoluteDeviation _ADCLN | 214     | 141     | 164     | 61     | <0.001 |
| 25Percentile _ADCLN            | 1108    | 308     | 912     | 244    | 0.009  |
| 50Percentile _ADCLN            | 1320    | 394     | 1037    | 298    | <0.001 |
| 75Percentile _ADCLN            | 1554    | 657     | 1242    | 315    | <0.001 |
| 90Percentile _ADCLN            | 1837    | 708     | 1485    | 352    | <0.001 |
| 95Percentile _ADCLN            | 2004    | 626     | 1642    | 360    | <0.001 |
| Range _ADCLN                   | 2783    | 816     | 2065    | 760    | 0.001  |
| EnergyNorm _DLN                | 1525907 | 836340  | 925946  | 472561 | <0.001 |
| GlobalEntropy _DLN             | 6.16    | 0.57    | 5.70    | 0.55   | <0.001 |
| GlobalMax _DLN                 | 2515    | 818     | 1928    | 564    | <0.001 |

|                              |        |        |       |       |        |
|------------------------------|--------|--------|-------|-------|--------|
| GlobalMean_DLN               | 1169   | 308    | 944   | 247   | <0.001 |
| GlobalMedian_DLN             | 1190   | 334    | 917   | 265   | <0.001 |
| GlobalStd_DLN                | 359    | 190    | 233   | 116   | <0.001 |
| GlobalUniformity_DLN         | 0.017  | 0.007  | 0.023 | 0.009 | <0.001 |
| InterQuartileRange_DLN       | 454    | 233    | 295   | 156   | <0.001 |
| LocalEntropyMax_DLN          | 5.88   | 0.24   | 5.75  | 0.20  | 0.007  |
| LocalEntropyMean_DLN         | 5.12   | 0.28   | 4.86  | 0.33  | <0.001 |
| LocalEntropyMedian_DLN       | 5.17   | 0.33   | 4.91  | 0.28  | <0.001 |
| LocalRangeMax_DLN            | 2597   | 911    | 1996  | 588   | 0.008  |
| LocalRangeMean_DLN           | 841    | 506    | 615   | 347   | 0.001  |
| LocalRangeMedian_DLN         | 782    | 480    | 532   | 384   | <0.001 |
| LocalRangeStd_DLN            | 398    | 253    | 331   | 130   | 0.008  |
| LocalStdMax_DLN              | 822    | 470    | 607   | 272   | 0.005  |
| LocalStdMean_DLN             | 247    | 142    | 172   | 99    | 0.001  |
| LocalStdMedian_DLN           | 217    | 128    | 145   | 90    | <0.001 |
| LocalStdStd_DLN              | 123    | 81     | 97    | 50    | 0.005  |
| MeanAbsoluteDeviation_DLN    | 272    | 153    | 180   | 91    | <0.001 |
| MedianAbsoluteDeviation_DLN  | 219    | 121    | 140   | 70    | <0.001 |
| 25Percentile_DLN             | 951    | 282    | 772   | 221   | 0.002  |
| 50Percentile_DLN             | 1190   | 334    | 917   | 265   | <0.001 |
| 75Percentile_DLN             | 1352   | 458    | 1069  | 285   | <0.001 |
| 90Percentile_DLN             | 1635   | 581    | 1278  | 308   | <0.001 |
| 95Percentile_DLN             | 1841   | 840    | 1407  | 303   | <0.001 |
| Range_DLN                    | 2149   | 770    | 1543  | 555   | <0.001 |
| RootMeanSquare_DLN           | 1235   | 333    | 962   | 250   | <0.001 |
| Variance_DLN                 | 129395 | 144447 | 54114 | 60061 | <0.001 |
| InterQuartileRange_DLN       | 514    | 297    | 318   | 181   | <0.001 |
| MeanAbsoluteDeviation_DLN    | 328    | 136    | 203   | 133   | <0.001 |
| MedianAbsoluteDeviation_DLN  | 250    | 147    | 152   | 85    | <0.001 |
| 50Percentile_DLN             | 1174   | 353    | 894   | 237   | 0.001  |
| 75Percentile_DLN             | 1342   | 453    | 1055  | 288   | <0.001 |
| 90Percentile_DLN             | 1633   | 614    | 1269  | 279   | <0.001 |
| 95Percentile_DLN             | 1812   | 847    | 1405  | 305   | <0.001 |
| Range_DLN                    | 2394   | 871    | 1843  | 483   | 0.001  |
| JointAverage_ADCPT           | 8.84   | 3.21   | 6.30  | 2.64  | 0.002  |
| JointVariance_ADCPT          | 6.21   | 7.22   | 5.24  | 2.93  | 0.002  |
| DifferenceAverage_ADCPT      | 2.15   | 1.20   | 1.87  | 0.63  | 0.007  |
| SumAverage_ADCPT             | 18     | 6      | 13    | 5     | 0.002  |
| SumVariance_ADCPT            | 19     | 20     | 14    | 9     | 0.002  |
| Contrast_ADCPT               | 7.85   | 10.13  | 6.16  | 3.77  | 0.008  |
| Dissimilarity_ADCPT          | 2.15   | 1.20   | 1.87  | 0.63  | 0.007  |
| InverseDifference_ADCPT      | 0.44   | 0.11   | 0.48  | 0.08  | 0.004  |
| InverseDiffMoment_ADCPT      | 0.37   | 0.13   | 0.42  | 0.10  | 0.005  |
| InverseVariance_ADCPT        | 0.36   | 0.11   | 0.39  | 0.05  | 0.004  |
| AutoCorrelation_ADCPT        | 81     | 56     | 41    | 36    | 0.002  |
| ClusterTendendcy_ADCPT       | 19     | 20     | 14    | 9     | 0.002  |
| ClusterProminence_ADCPT      | 1364   | 2565   | 752   | 768   | 0.004  |
| InformationMeasureCor2_ADCPT | 0.81   | 0.16   | 0.74  | 0.16  | 0.009  |
| GLNonuniformityNorm_ADCPT    | 0.08   | 0.04   | 0.10  | 0.03  | 0.007  |

|                             |       |       |       |       |        |
|-----------------------------|-------|-------|-------|-------|--------|
| GrayLevelVariance _ADCPT    | 15.69 | 7.68  | 11.21 | 4.66  | 0.001  |
| ShortRunEmphasis _ADCPT     | 0.93  | 0.05  | 0.90  | 0.05  | 0.010  |
| HighGLRunEmpha _ADCPT       | 91    | 68    | 52    | 41    | 0.003  |
| ShortRunHighGLEmpha _ADCPT  | 85    | 57    | 47    | 37    | 0.002  |
| LongRunHighGLEmpha _ADCPT   | 125   | 84    | 78    | 45    | 0.007  |
| GrayLevelVariance _ADCPT    | 8.43  | 7.15  | 6.49  | 3.89  | 0.004  |
| GLNonuniformityNorm _ADCPT  | 0.24  | 0.09  | 0.31  | 0.11  | 0.001  |
| GrayLevelVariance _ADCPT    | 2.15  | 1.38  | 1.47  | 0.89  | 0.005  |
| HighDepenEmphasis _ADCPT    | 16    | 19    | 27    | 24    | 0.009  |
| HighGLCountEmpha _ADCPT     | 89    | 65    | 48    | 40    | 0.002  |
| HighDepenLowGLEmpha _ADCPT  | 0.51  | 0.62  | 1.09  | 1.81  | 0.001  |
| GLVariance _ADCPT           | 7.64  | 7.47  | 6.24  | 3.65  | 0.004  |
| DepCountVariance _ADCPT     | 4.00  | 6.70  | 7.49  | 6.41  | 0.004  |
| JointAverage _DPT           | 8.11  | 3.29  | 5.79  | 1.85  | <0.001 |
| SumAverage _DPT             | 16    | 7     | 12    | 4     | <0.001 |
| AutoCorrelation _DPT        | 68    | 52    | 37    | 22    | <0.001 |
| LargeDistHighGLEmpha _DPT   | 114   | 73    | 75    | 38    | 0.007  |
| GrayLevelVariance _DPT      | 13    | 8     | 10    | 5     | 0.009  |
| HighGLRunEmpha _DPT         | 73    | 50    | 46    | 26    | 0.001  |
| ShortRunHighGLEmpha _DPT    | 66    | 50    | 40    | 25    | 0.001  |
| LongRunLowGLEmpha _DPT      | 0.051 | 0.050 | 0.090 | 0.068 | 0.001  |
| LongRunHighGLEmpha _DPT     | 101   | 69    | 66    | 40    | 0.002  |
| GLNonuniformityNorm _DPT    | 0.27  | 0.10  | 0.32  | 0.14  | 0.004  |
| GrayLevelVariance _DPT      | 1.80  | 1.00  | 1.28  | 0.93  | 0.003  |
| HighGLCountEmpha _DPT       | 71    | 53    | 43    | 27    | 0.001  |
| LowDepenHighGLEmpha _DPT    | 18    | 24    | 11    | 12    | 0.008  |
| HighDepenLowGLEmpha _DPT    | 0.53  | 1.27  | 1.42  | 1.72  | <0.001 |
| DepCountVariance _DPT       | 4.19  | 6.60  | 9.12  | 9.96  | 0.008  |
| JointMaximum _ADCLN         | 0.04  | 0.04  | 0.07  | 0.03  | 0.002  |
| JointAverage _ADCLN         | 8.49  | 5.71  | 6.38  | 2.71  | <0.001 |
| JointVariance _ADCLN        | 9.42  | 10.70 | 6.13  | 4.74  | <0.001 |
| JointEntropy _ADCLN         | 6.25  | 1.23  | 5.63  | 0.92  | 0.001  |
| DifferenceAverage _ADCLN    | 2.65  | 1.47  | 1.93  | 0.88  | <0.001 |
| DifferenceVariance _ADCLN   | 5.06  | 6.17  | 2.89  | 2.14  | <0.001 |
| DifferenceEntropy _ADCLN    | 2.82  | 0.73  | 2.46  | 0.40  | <0.001 |
| SumAverage _ADCLN           | 17    | 11    | 13    | 5     | <0.001 |
| SumVariance _ADCLN          | 28    | 30    | 17    | 13    | 0.002  |
| SumEntropy _ADCLN           | 4.17  | 0.68  | 3.79  | 0.53  | 0.001  |
| AngularSecondMoment _ADCLN  | 0.017 | 0.016 | 0.030 | 0.014 | <0.001 |
| Contrast _ADCLN             | 11.9  | 15.5  | 6.8   | 5.7   | <0.001 |
| Dissimilarity _ADCLN        | 2.65  | 1.47  | 1.93  | 0.88  | <0.001 |
| InverseDifference _ADCLN    | 0.39  | 0.06  | 0.48  | 0.10  | <0.001 |
| InverseDiffMoment _ADCLN    | 0.30  | 0.07  | 0.41  | 0.12  | <0.001 |
| InverseVariance _ADCLN      | 0.31  | 0.08  | 0.39  | 0.09  | <0.001 |
| AutoCorrelation _ADCLN      | 80    | 131   | 44    | 34    | <0.001 |
| ClusterTendendcy _ADCLN     | 28    | 30    | 17    | 13    | 0.002  |
| ClusterProminence _ADCLN    | 2307  | 5508  | 1195  | 1781  | 0.004  |
| HighGrayLevelEmpha _ADCLN   | 115   | 125   | 71    | 46    | 0.001  |
| SmallDistHighGLEmpha _ADCLN | 102   | 98    | 66    | 46    | 0.002  |



|                             |       |       |       |       |        |
|-----------------------------|-------|-------|-------|-------|--------|
| LargeDistHighGLEmpa _ADCLN  | 137   | 297   | 92    | 84    | 0.004  |
| GLNonuniformityNorm _ADCLN  | 0.07  | 0.02  | 0.09  | 0.04  | <0.001 |
| ZonePercentage _ADCLN       | 0.34  | 0.17  | 0.24  | 0.23  | 0.004  |
| GrayLevelVariance _ADCLN    | 18    | 14    | 12    | 7     | 0.001  |
| ZoneDistEntropy _ADCLN      | 4.3   | 0.9   | 3.9   | 0.7   | 0.004  |
| ShortRunEmphasis _ADCLN     | 0.9   | 0.0   | 0.9   | 0.1   | 0.005  |
| HighGLRunEmpha _ADCLN       | 92    | 134   | 52    | 40    | <0.001 |
| ShortRunHighGLEmpa _ADCLN   | 86    | 125   | 47    | 38    | <0.001 |
| LongRunLowGLEmpa _ADCLN     | 0.05  | 0.06  | 0.08  | 0.13  | 0.004  |
| LongRunHighGLEmpa _ADCLN    | 125   | 184   | 69    | 48    | 0.001  |
| GLNonuniformityNorm _ADCLN  | 0.09  | 0.04  | 0.12  | 0.04  | <0.001 |
| RLNonuniformityNorm _ADCLN  | 0.83  | 0.07  | 0.78  | 0.10  | 0.005  |
| RunPercentage _ADCLN        | 0.91  | 0.04  | 0.88  | 0.07  | 0.008  |
| GrayLevelVariance _ADCLN    | 12    | 12    | 7     | 5     | <0.001 |
| RunEntropy _ADCLN           | 4.13  | 0.60  | 3.88  | 0.40  | 0.004  |
| LargeZoneLowGLEmpa _ADCLN   | 88    | 382   | 590   | 1100  | 0.009  |
| GLNonuniformityNorm _ADCLN  | 0.23  | 0.09  | 0.29  | 0.13  | 0.001  |
| GrayLevelVariance _ADCLN    | 2.72  | 1.53  | 1.41  | 1.34  | <0.001 |
| LowDepenEmphasis _ADCLN     | 0.28  | 0.14  | 0.21  | 0.14  | 0.002  |
| HighGLCountEmpha _ADCLN     | 89    | 134   | 50    | 40    | <0.001 |
| LowDepenHighGLEmpa _ADCLN   | 31    | 37    | 15    | 19    | <0.001 |
| HighDepenLowGLEmpa _ADCLN   | 0.43  | 0.42  | 1.01  | 2.02  | 0.001  |
| GLNonuniformityNorm _ADCLN  | 0.10  | 0.04  | 0.13  | 0.05  | <0.001 |
| GLVariance _ADCLN           | 11    | 12    | 7     | 5     | <0.001 |
| JointMaximum _DLN           | 0.05  | 0.03  | 0.08  | 0.06  | <0.001 |
| JointAverage _DLN           | 7.61  | 3.52  | 5.81  | 1.96  | 0.001  |
| JointVariance _DLN          | 8.39  | 9.68  | 4.15  | 4.38  | <0.001 |
| JointEntropy _DLN           | 6.08  | 1.14  | 5.19  | 1.08  | <0.001 |
| DifferenceAverage _DLN      | 2.57  | 1.00  | 1.66  | 0.79  | <0.001 |
| DifferenceVariance _DLN     | 3.61  | 3.81  | 2.16  | 1.54  | <0.001 |
| DifferenceEntropy _DLN      | 2.68  | 0.42  | 2.27  | 0.46  | <0.001 |
| SumAverage _DLN             | 15    | 7     | 12    | 4     | 0.001  |
| SumVariance _DLN            | 24    | 32    | 12    | 15    | <0.001 |
| SumEntropy _DLN             | 4.08  | 0.78  | 3.54  | 0.52  | <0.001 |
| AngularSecondMoment _DLN    | 0.020 | 0.017 | 0.035 | 0.031 | <0.001 |
| Contrast _DLN               | 10.40 | 8.83  | 4.95  | 4.49  | <0.001 |
| Dissimilarity _DLN          | 2.57  | 1.00  | 1.66  | 0.79  | <0.001 |
| InverseDifference _DLN      | 0.40  | 0.08  | 0.50  | 0.10  | <0.001 |
| InverseDiffMoment _DLN      | 0.32  | 0.09  | 0.44  | 0.13  | <0.001 |
| InverseVariance _DLN        | 0.33  | 0.09  | 0.41  | 0.09  | <0.001 |
| AutoCorrelation _DLN        | 66    | 52    | 36    | 26    | 0.001  |
| ClusterTendendcy _DLN       | 24    | 32    | 11    | 15    | <0.001 |
| ClusterProminence _DLN      | 1802  | 10840 | 504   | 1511  | 0.001  |
| InformationMeasureCor2 _DLN | 0.89  | 0.19  | 0.76  | 0.21  | 0.008  |
| HighGrayLevelEmpha _DLN     | 82    | 80    | 54    | 29    | 0.004  |
| SmallDistHighGLEmpa _DLN    | 69    | 73    | 46    | 28    | 0.006  |
| GLNonuniformityNorm _DLN    | 0.08  | 0.03  | 0.11  | 0.04  | <0.001 |
| ZonePercentage _DLN         | 0.32  | 0.19  | 0.18  | 0.17  | 0.006  |
| GrayLevelVariance _DLN      | 14    | 13    | 10    | 6     | <0.001 |

|                                |      |      |      |      |        |
|--------------------------------|------|------|------|------|--------|
| ZoneDistEntropy _DLN           | 4.15 | 1.01 | 3.57 | 0.96 | 0.004  |
| ShortRunEmphasis _DLN          | 0.93 | 0.04 | 0.89 | 0.06 | 0.002  |
| LongRunEmphasis _DLN           | 1.32 | 0.23 | 1.58 | 0.45 | 0.003  |
| HighGLRunEmpha _DLN            | 77   | 45   | 40   | 28   | <0.001 |
| ShortRunHighGLEmpha _DLN       | 72   | 43   | 36   | 27   | <0.001 |
| LongRunHighGLEmpha _DLN        | 99   | 64   | 59   | 37   | 0.007  |
| GLNonuniformityNorm _DLN       | 0.10 | 0.04 | 0.14 | 0.05 | <0.001 |
| RLNonuniformityNorm _DLN       | 0.84 | 0.10 | 0.75 | 0.13 | 0.003  |
| RunPercentage _DLN             | 0.91 | 0.06 | 0.85 | 0.08 | 0.003  |
| GrayLevelVariance _DLN         | 9.4  | 10.6 | 5.0  | 5.4  | <0.001 |
| RunLengthVariance _DLN         | 0.11 | 0.09 | 0.20 | 0.17 | 0.004  |
| RunEntropy _DLN                | 4.04 | 0.55 | 3.63 | 0.48 | 0.002  |
| HighGLZoneEmpha _DLN           | 10.1 | 7.2  | 7.7  | 3.9  | 0.007  |
| GLNonuniformityNorm _DLN       | 0.25 | 0.09 | 0.33 | 0.13 | <0.001 |
| GrayLevelVariance _DLN         | 2.24 | 1.46 | 1.22 | 1.05 | 0.002  |
| LowDepenEmphasis _DLN          | 0.26 | 0.15 | 0.17 | 0.11 | 0.003  |
| HighDepenEmphasis _DLN         | 15   | 12   | 29   | 29   | 0.005  |
| HighGLCountEmpha _DLN          | 74   | 44   | 39   | 30   | <0.001 |
| LowDepenHighGLEmpha _DLN       | 20   | 21   | 8    | 10   | <0.001 |
| HighDepenLowGLEmpha _DLN       | 0.54 | 1.08 | 1.50 | 2.63 | 0.001  |
| GLNonuniformityNorm _DLN       | 0.10 | 0.04 | 0.15 | 0.07 | <0.001 |
| DepCountNonuniformityNorm _DLN | 0.17 | 0.09 | 0.12 | 0.08 | 0.006  |
| GLVariance _DLN                | 9.2  | 10.4 | 4.5  | 5.4  | <0.001 |

\*Diffusion coefficients, ADC and D, are expressed in  $10^{-6}$  mm<sup>2</sup>/s; Abbreviation: IQR, interquartile range

**Supplementary Table S4.** Comparison between the performances of the proposed models in the validation set

| Model | 1    | 2    | 3    | 4    | 5    | 6    |
|-------|------|------|------|------|------|------|
| 1     | 1.00 | 1.00 | 0.69 | 0.34 | 1.00 | 0.14 |
| 2     | 1.00 | 1.00 | 0.50 | 0.22 | 1.00 | 0.09 |
| 3     | 0.69 | 0.50 | 1.00 | 0.38 | 0.73 | 0.15 |
| 4     | 0.34 | 0.22 | 0.38 | 1.00 | 0.29 | 0.39 |
| 5     | 1.00 | 1.00 | 0.73 | 0.29 | 1.00 | 0.17 |
| 6     | 0.14 | 0.09 | 0.15 | 0.39 | 0.17 | 1.00 |

P-values refer to the mid-p-value McNemar test.

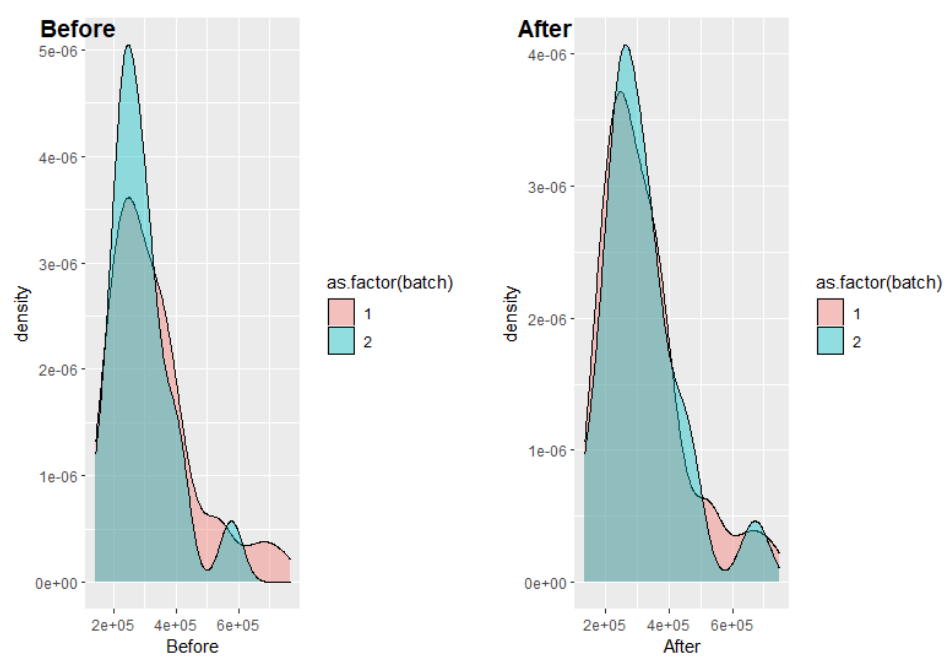

**Supplementary Figure S1.** The effect of the ComBat-based feature harmonization on the validation set, which were in part examined on the 1.5T system ( $n = 30$ ) and in part on the 3T system ( $n = 19$ ).

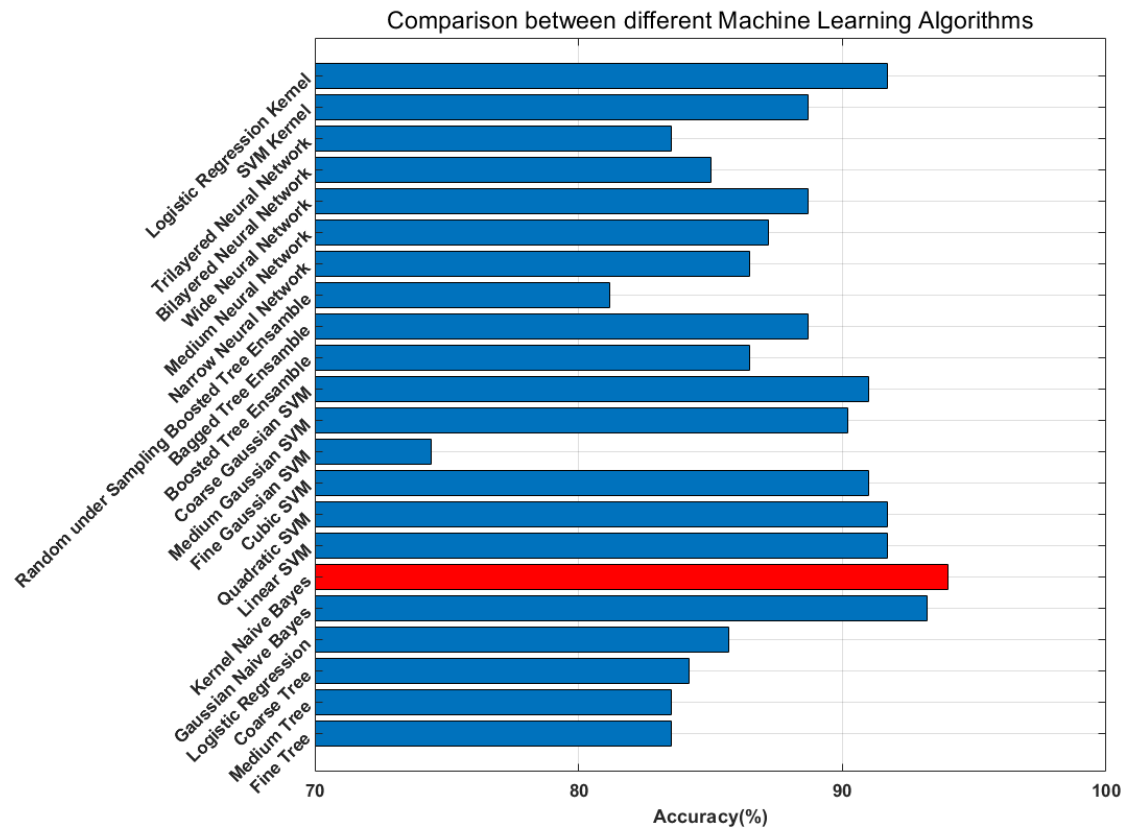

**Supplementary Figure S2.** Comparison between accuracies obtained from different families of machine learning algorithms.
